# Supplementary material for: Molecular magnetism in nanodomains of isoreticular MIL-88(Fe)-MOFs
Source: Royal Society of Chemistry journal article supplement (doi:10.1039/d1cp03122h), 2021-01-01
Supplement: d1cp03122h1.pdf [file d1cp03122h1.pdf]

## Supporting Information

### Molecular Magnetism in Nanodomains of Isoreticular MIL-88(Fe)-MOFs

Sheeba Dawood,<sup>a</sup> Surabhi Shaji,<sup>b</sup> Gayani Pathiraja,<sup>a</sup> Yirong Mo,<sup>a\*</sup> and Hemali Rathnayake<sup>a\*</sup>

<sup>a</sup>Department of Nanoscience, Joint School of Nanoscience and Nanoengineering, University of North Carolina at Greensboro, 2907 East Gate City Blvd, Greensboro, NC 27401

<sup>b</sup>Department of Mechanical Engineering, North Carolina A&T State University, 1601 East Market Street, Greensboro, NC 27411

**KEYWORDS.** *Molecular magnetism, Isoreticular MOFs, Superparamagnetic, MIL-88, MIL-126, Fe<sup>III</sup>-MOFs.*

**Table 1:** XPS survey analysis and elemental compositions and binding energies of each elements for all three MIL-88 analogues

| Elemental transition peak                      | Energy (eV)                  | Chemical & oxidation states         | % Weight (Experimental) | % Weight (Experimental) |
|------------------------------------------------|------------------------------|-------------------------------------|-------------------------|-------------------------|
| <b>MIL-88B</b>                                 |                              |                                     |                         |                         |
| C 1s                                           | 283.42 & 286.23              | C-C, C-O-C                          | 41.41                   | 41.54                   |
| O 1s                                           | 530.19                       | Fe-O-C                              | 32.73                   | 32.28                   |
| Fe 2p<br>2p <sub>3/2</sub> & 2p <sub>1/2</sub> | 710.83,<br>715.53<br>723.78  | Fe <sup>+2</sup> & Fe <sup>+3</sup> | 24.77                   | 24.14                   |
| <b>MIL-88C</b>                                 |                              |                                     |                         |                         |
| C 1s                                           | 284.54 & 287.37              | C-C, O-C=O                          | 50.89                   | 50.86                   |
| O 1s                                           | 530.28                       | Fe-O-C                              | 27.05                   | 26.35                   |
| Fe 2p<br>2p <sub>3/2</sub> & 2p <sub>1/2</sub> | 710.83,<br>715.53,<br>723.78 | Fe <sup>+2</sup> & Fe <sup>+3</sup> | 20.17                   | 19.71                   |
| <b>MIL-126</b>                                 |                              |                                     |                         |                         |
| C 1s                                           | 284.54 & 287.37              | C-C, O-C=O                          | 50.89                   | 50.86                   |
| O 1s                                           | 530.28                       | Fe-O-C                              | 27.05                   | 26.35                   |
| Fe 2p<br>2p <sub>3/2</sub> & 2p <sub>1/2</sub> | 710.83,<br>715.53,<br>723.78 | Fe <sup>+2</sup> & Fe <sup>+3</sup> | 20.17                   | 19.71                   |

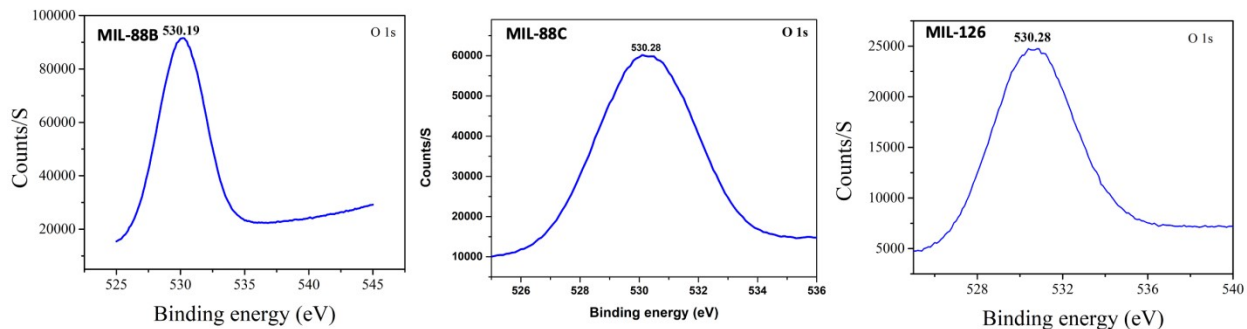

**Figure S1:** The binding energy O 1s spectra for all three analogues of MIL-88 analogues.

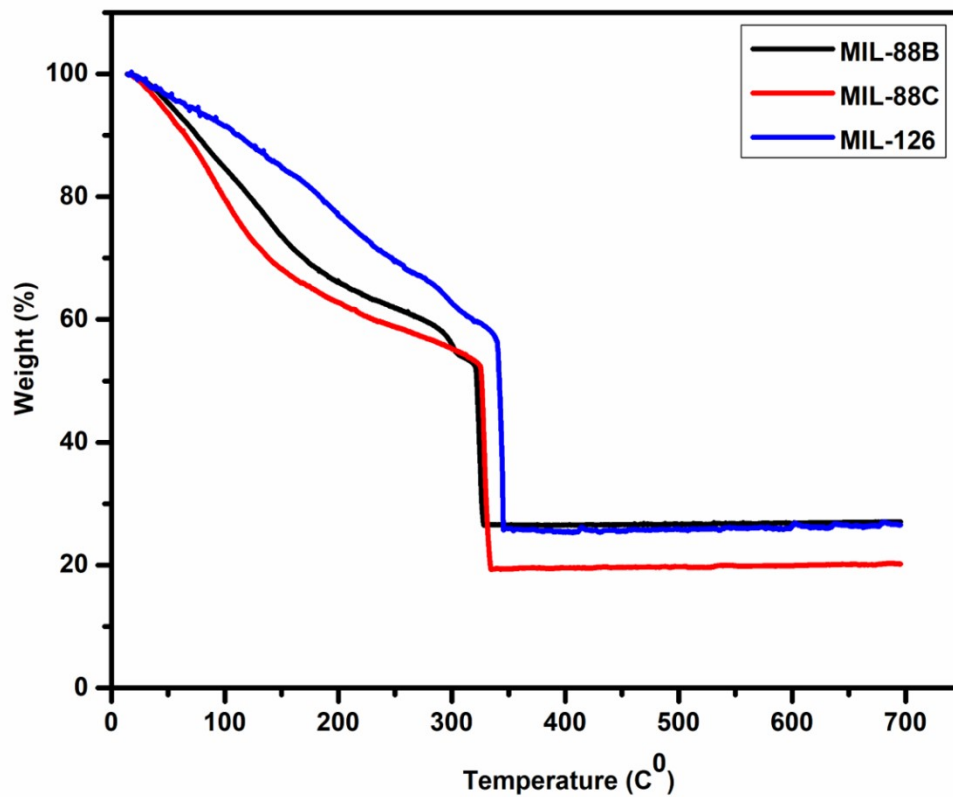

**Figure S2:** Thermal stabilities of all three analogues of MIL-88.

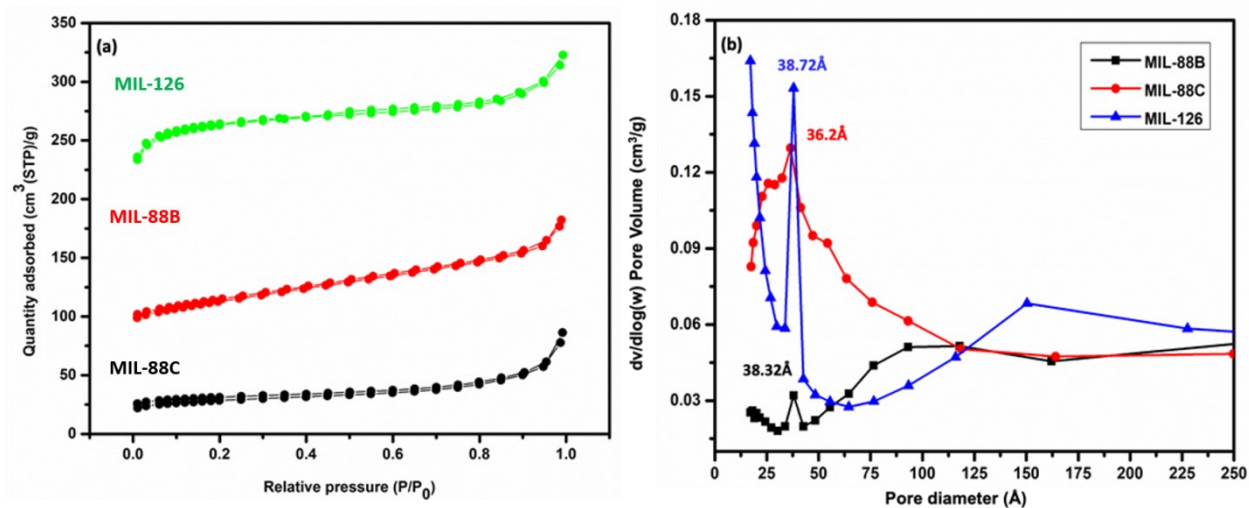

**Figure S3:** (a) The isotherms of MIL-88B, MIL-88C, and MIL-126; (b) The BJH pore distributions for MIL-88(Fe)-MOFs

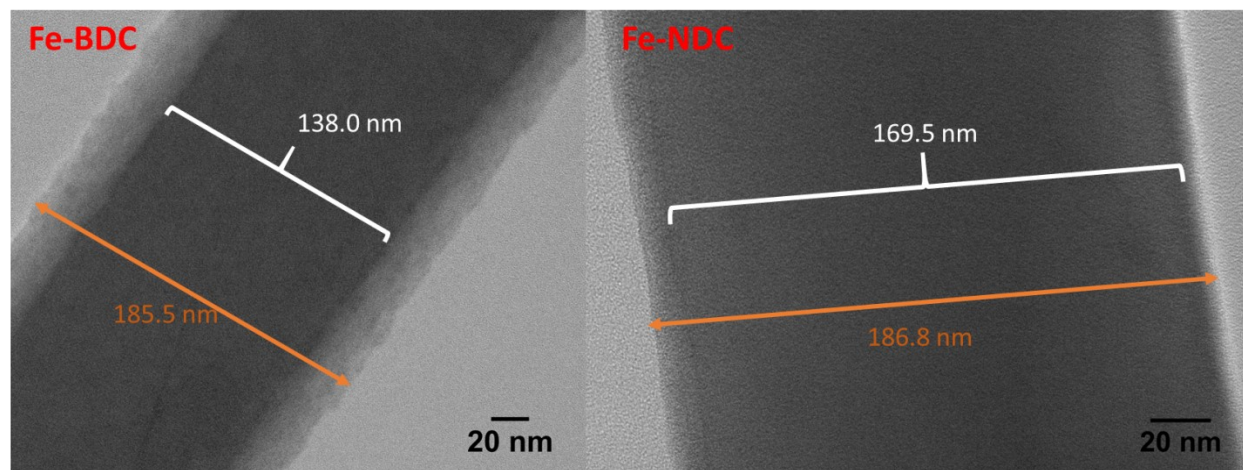

**Figure S4.** The thicknesses of the core and the shell are found to be ~138 nm and ~47.5 nm for MIL-88B and 169.8 nm and 17.3 nm for MIL-88C, respectively (Figure S4).

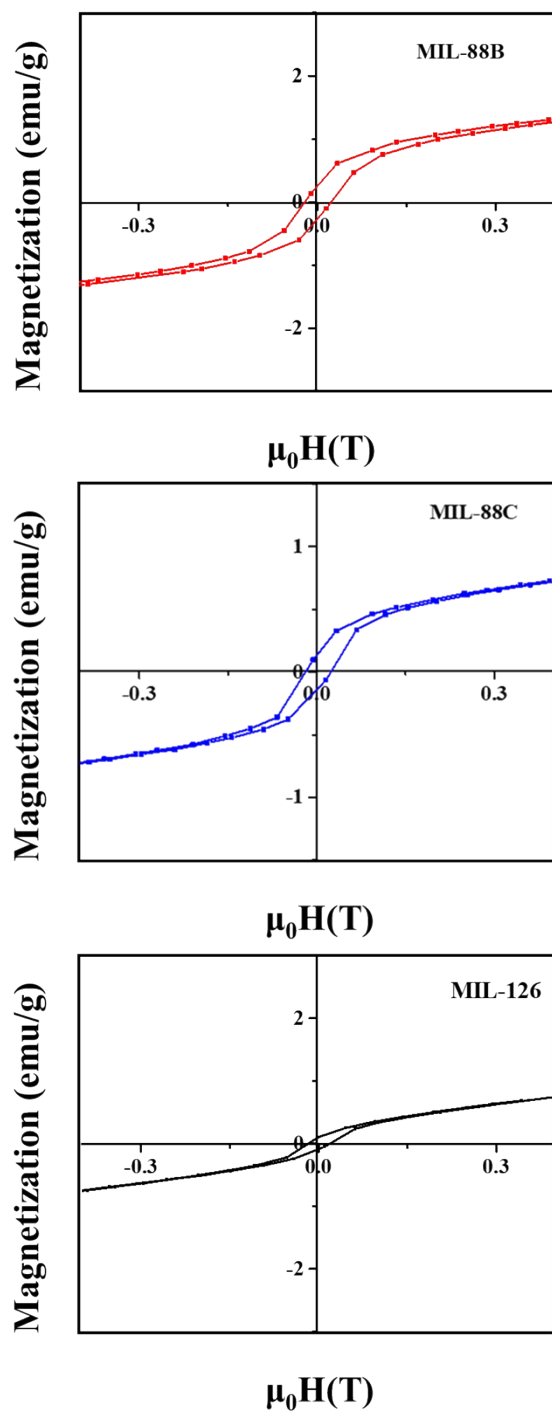

**Figure S5:** M-H loops for three MIL-88(Fe) MOFs at 10 K.
